# Supplementary material for: Effects of vitamin D supplementation on metabolic and endocrine parameters in PCOS: a randomized-controlled trial
Source: PubMed Central journal article supplement (PMC6647224; doi:10.1007/s00394-018-1760-8), 2018-06-26
Supplement: 394_2018_1760_MOESM1_ESM.pdf [file 394_2018_1760_MOESM1_ESM.pdf]

28 nmol/L, intraassay and interassay coefficients of variation (CVs) were <4.5% and <5.5%, respectively.  
29 The limit of quantification (LOQ) was 4.0 nmol/L.

30 For TT, the internal standard  $^{13}\text{C}_3$ -testosterone was added to the samples and testosterone was  
31 released from its binding proteins with acetonitrile. After a liquid-liquid extraction by hexane, the  
32 samples were analyzed by LC-MS/MS (Acquity 2D-UPLC coupled to a Xevo TQ-S tandem mass  
33 spectrometer, Waters Corp., Milford, MA, USA). Interassay variation at 0.1 nmol/L was 10.6% and  
34 <6% between 0.9 and 14 nmol/L. The LOQ was 0.10 nmol/L.

35 Both methods to measure either 25(OH)D and TT were well-standardized [2,4].

36

### 37 *Biochemical analyses*

38 To evaluate inclusion criteria, 25(OH)D was initially measured by a commercially available enzyme  
39 immunoassay (IDS, Boldon, UK) with intra- and interassay CVs of 5.6 and 6.4%, respectively. To  
40 establish the diagnosis of PCOS, TT was initially measured by luminescence immunoassay (Siemens,  
41 Erlangen, Germany) with intra- and interassay CVs of <10%. Insulin was measured by luminescence  
42 immunoassay (Siemens, Erlangen, Germany) with intra- and interassay CVs of 4% and 2.6%,  
43 respectively. PTH was measured by ElectroChemiLuminescence immunoassay (ECLIA; Roche  
44 Diagnostics, Mannheim, Germany) with intra- and interassay CVs of 1.5-2.7% and 3.0-6.5%,  
45 respectively. Sex hormone-binding globulin (SHBG; for calculation of FT and FAI) was measured by  
46 luminescence immunoassay (Cobas, Roche, Basel, Switzerland) with intra- and interassay CVs of  
47 1.3% and 2.1%, respectively. Androstendione and dehydroepiandrosterone-sulfate (DHEAS) were  
48 measured by ELISA (DiaMetra, BioVendor, Brno, Czech Republic and LDN Labor Diagnostika Nord  
49 GmbH, Nordhorn, Germany) with intra- and interassay CVs of <10%. Estradiol was measured by  
50 chemiluminescence immunoassay (Siemens, Erlangen, Germany) with intra- and interassay CVs of  
51 6.3-15% and 6.4-16%, respectively. Follicle-stimulating hormone (FSH) and luteinizing hormone  
52 (LH) were measured by enzyme immunoassay (DiaMetra S.r.l., Segrate (MI), Italy) with intra- and  
53 interassay CVs of <10%. 1,25(OH) $_2$ D was measured by chemiluminescence immunoassay (IDS,  
54 Boldon, UK) with intra- and interassay CVs of 6.4-12.1% and 6.6-9.6%, respectively.

55 All other parameters [plasma glucose, HbA1c, triglycerides, TC, HDL-cholesterol, LDL-  
56 cholesterol, C-reactive protein (CRP), plasma calcium] were determined by routine laboratory  
57 diagnostics. To avoid glycolysis and therefore incorrect measurements, plasma glucose was measured  
58 from tubes containing sodium fluoride.

59

60

61

62

63

64

65

66

67

68

69

70

71

72

73

74

75

76

77

78

79

80

81

82

83 **Supplemental Table 1:** Normal ranges of baseline biochemical and anthropometric parameters

84 (where available) and participants within these ranges

85

| Parameter                                    | Normal Range            | Participants [%] |
|----------------------------------------------|-------------------------|------------------|
| Body-mass index (kg/m <sup>2</sup> )         | <18.5 underweight       | 0.8              |
|                                              | 18.5-25.0 normal weight | 49.2             |
|                                              | 25.0-30.0 overweight    | 19.7             |
|                                              | >30.0 obese             | 30.3             |
| Waist circumference (cm) [5]                 | <80                     | 32.1             |
| WHR (cm/cm) [6]                              | <0.85                   | 54.2             |
| Systolic BP (mmHg) [7]                       | <130                    | 79.2             |
| Diastolic BP (mmHg) [7]                      | <85                     | 70.8             |
| Fasting glucose (mg/dL) [8]                  | <100                    | 98.4             |
| OGTT glucose 120 min (mg/dL) [8]             | <140 (for prediabetes)  | 95.1             |
|                                              | <200 (for diabetes)     | 100              |
| Fasting insulin (mU/L)                       | 3.0-25.0                | 85.4             |
| HbA1c (mmol/mol) [8]                         | <39 (for prediabetes)   | 91.9             |
|                                              | <48 (for diabetes)      | 100              |
| Triglycerides (mg/dL)                        | <150                    | 91.7             |
| Total cholesterol (mg/dL)                    | <200                    | 78.5             |
| HDL-cholesterol (mg/dL)                      | >40                     | 92.5             |
| CRP (mg/L)                                   | <5                      | 84.9             |
| 25(OH)D (nmol/L)*                            | 75-150                  | 0                |
| PTH (pg/mL)                                  | 15.0-65.0               | 89.4             |
| Plasma calcium (mmol/L)                      | 2.20-2.65               | 95.1             |
| Total testosterone (nmol/L) <sup>+</sup> [9] | 0.30-1.69               | 60.2             |
| Androstendione (ng/mL)                       | 0.75-3.20               | 47.2             |
| DHEAS (µg/mL)                                | 0.46-2.75               | 73.2             |

86

87 \*Normal range of the commercially available immunoassays used to evaluate study eligibility.

88 <sup>+</sup>Normal range of the ID-LC-MS/MS method used to measure total testosterone; for recruitment and to

89 establish the clinical diagnosis of polycystic ovary syndrome, a commercially available immunoassay

90 measurement was used

91 25(OH)D = 25-hydroxyvitamin D; BP = blood pressure; CRP = C-reactive protein; DHEAS =

92 dehydroepiandrosterone-sulfate; HbA1c = glycated hemoglobin; HDL-cholesterol = high density

93 lipoprotein-cholesterol; LDL-cholesterol = low density lipoprotein-cholesterol; OGTT glucose 120

94 min = plasma glucose at 120 minutes during 75g oral glucose tolerance test; PTH = parathyroid

95 hormone; WHR = waist-to-hip ratio

96 **Supplemental Table 2:** Primary and secondary outcome variables at baseline and final follow-up

97 after 12 weeks in study participants with available values at both study visits

98

|                                     | <b>Baseline</b>     | <b>Follow-Up (12 weeks)</b> | <b>Treatment Effect (95% CI)</b> | <b>p-value</b> |
|-------------------------------------|---------------------|-----------------------------|----------------------------------|----------------|
| <i>AUCgluc</i>                      |                     |                             |                                  |                |
| Vitamin D (n=92)                    | 228.05±46.45        | 210.59±46.35                | -12.89 (-24.70 to -1.08)         | 0.033          |
| Placebo (n=45)                      | 210.04±40.39        | 209.77±47.54                |                                  |                |
| <i>Fasting glucose [mg/dL]</i>      |                     |                             |                                  |                |
| Vitamin D (n=94)                    | 84±8                | 83±9                        | -0.5 (-2.9 to 1.9)               | 0.681          |
| Placebo (n=46)                      | 84±8                | 84±7                        |                                  |                |
| <i>OGTT glucose 30 min [mg/dL]</i>  |                     |                             |                                  |                |
| Vitamin D (n=91)                    | 133±25              | 131±29                      | -3.0 (-11.0 to 4.9)              | 0.452          |
| Placebo (n=45)                      | 127±24              | 130±23                      |                                  |                |
| <i>OGTT glucose 60 min [mg/dL]</i>  |                     |                             |                                  |                |
| Vitamin D (n=91)                    | 122±40              | 108±35                      | -10.8 (-20.0 to -1.6)            | 0.022          |
| Placebo (n=45)                      | 107±31              | 108±39                      |                                  |                |
| <i>OGTT glucose 120 min [mg/dL]</i> |                     |                             |                                  |                |
| Vitamin D (n=92)                    | 99±24               | 87±21                       | -2.8 (-9.9 to 4.3)               | 0.430          |
| Placebo (n=45)                      | 91±24               | 86±25                       |                                  |                |
| <i>HbA1c [mmol/mol]*</i>            |                     |                             |                                  |                |
| Vitamin D (n=42)                    | 33 (31-35)          | 34 (32-35)                  | 0.4 (-0.2 to 1.0)                | 0.166          |
| Placebo (n=85)                      | 34 (32-35)          | 33 (32-35)                  |                                  |                |
| <i>HOMA-IR*</i>                     |                     |                             |                                  |                |
| Vitamin D (n=94)                    | 1.92 (1.09-3.49)    | 2.32 (1.34-3.62)            | 0.52 (-0.96 to 1.99)             | 0.134          |
| Placebo (n=46)                      | 2.15 (1.28-3.00)    | 2.02 (1.06-3.23)            |                                  |                |
| <i>QUICKI*</i>                      |                     |                             |                                  |                |
| Vitamin D (n=94)                    | 0.346 (0.318-0.378) | 0.336 (0.316-0.366)         | -0.009 (-0.022 to 0.003)         | 0.129          |
| Placebo (n=46)                      | 0.340 (0.324-0.369) | 0.343 (0.321-0.380)         |                                  |                |
| <i>Triglycerides [mg/dL]*</i>       |                     |                             |                                  |                |
| Vitamin D (n=91)                    | 63 (49-90)          | 69 (53-94)                  | 5 (-4 to 15)                     | 0.455          |
| Placebo (n=45)                      | 74 (51-114)         | 76 (58-95)                  |                                  |                |
| <i>Total cholesterol [mg/dL]*</i>   |                     |                             |                                  |                |
| Vitamin D (n=91)                    | 172 (156-190)       | 179 (151-194)               | 0.3 (-7 to 7)                    | 0.780          |
| Placebo (n=45)                      | 175 (142-203)       | 172 (148-197)               |                                  |                |
| <i>Total testosterone [nmol/L]*</i> |                     |                             |                                  |                |
| Vitamin D (n=92)                    | 1.55 (1.13-2.18)    | 1.50 (1.10-2.00)            | -0.14 (-0.34 to 0.06)            | 0.164          |
| Placebo (n=44)                      | 1.40 (1.20-1.80)    | 1.60 (1.13-1.88)            |                                  |                |
| <i>Free testosterone [nmol/L]*</i>  |                     |                             |                                  |                |
| Vitamin D (n=91)                    | 0.021 (0.016-0.032) | 0.021 (0.014-0.029)         | -0.001 (-0.004 to 0.002)         | 0.271          |
| Placebo (n=44)                      | 0.019 (0.015-0.035) | 0.022 (0.015-0.031)         |                                  |                |

99

100

101 Data are shown as means with standard deviation or medians and interquartile range, as appropriate.  
102 Treatment effects with 95% confidence interval and p-values were calculated by ANCOVA for group  
103 differences at follow-up with adjustment for baseline values.

104 \*Skewed variables for which logarithmic transformed values were used in ANCOVA, but  
105 untransformed values are shown in the table.

106 AUCgluc = plasma glucose area under the curve; HbA1c = glycated hemoglobin; HOMA-IR =  
107 homeostatic model assessment-insulin resistance; OGTT glucose 30 min = plasma glucose at 30  
108 minutes during 75g oral glucose tolerance test; OGTT glucose 60 min = plasma glucose at 60 minutes  
109 during 75g oral glucose tolerance test; OGTT glucose 120 min = plasma glucose at 120 minutes  
110 during 75g oral glucose tolerance test; QUICKI = quantitative insulin sensitivity check index

111

112

113

114

115

116

117

118

119

120

121

122

123

124

125

126

127

128

129

130

131 **References**

- 132 1. Yildiz BO, Bolour S, Woods K, Moore A, Azziz R (2010) Visually scoring hirsutism. *Hum*  
133 *Reprod Update* 16:51–64. <https://doi.org/10.1093/humupd/dmp024>
- 134 2. Dirks NF, Vesper HW, van Herwaarden AE, van den Ouweland JM, Kema IP, Krabbe JG,  
135 Heijboer AC (2016) Various calibration procedures result in optimal standardization of  
136 routinely used 25(OH)D ID-LC-MS/MS methods. *Clin Chim Acta* 462:49–54.  
137 <https://doi.org/10.1016/j.cca.2016.08.016>
- 138 3. Büttler RM, Martens F, Kushnir MM, Ackermans MT, Blankenstein MA, Heijboer AC (2015)  
139 Simultaneous measurement of testosterone, androstenedione and dehydroepiandrosterone  
140 (DHEA) in serum and plasma using isotope-dilution 2-dimension ultra high performance  
141 liquid-chromatography tandem mass spectrometry (ID-LC-MS/MS). *Clin Chim Acta* 438:157–  
142 159. <https://doi.org/10.1016/j.cca.2014.08.023>
- 143 4. Büttler RM, Martens F, Fanelli F, Pham HT, Kushnir MM, Janssen MJ, Owen L, Taylor AE,  
144 Soeborg T, Blankenstein MA, Heijboer AC (2015) Comparison of 7 published LC-MS/MS  
145 methods for the simultaneous measurement of testosterone, androstenedione, and  
146 dehydroepiandrosterone in serum. *Clin Chem* 61:1475–1483.  
147 <https://doi.org/10.1373/clinchem.2015.242859>
- 148 5. Lean ME, Han TS, Morrison CE (1995) Waist circumference as a measure for indicating need  
149 for weight management. *BMJ* 311:158-161. <https://doi.org/10.1136/bmj.311.6998.158>
- 150 6. World Health Organization (2011) Waist circumference and waist-hip ratio: report of a WHO  
151 expert consultation. World Health Organization, Geneva
- 152 7. Mancia G, Fagard R, Narkiewicz K, Redon J, Zanchetti A, Böhm M, Christiaens T, Cifkova  
153 R, De Backer G, Dominiczak A, Galderisi M, Grobbee DE, Jaarsma T, Kirchhof P, Kjeldsen  
154 SE, Laurent S, Manolis AJ, Nilsson PM, Ruilope LM, Schmieder RE, Sirnes PA, Sleight  
155 P, Viigimaa M, Waeber B, Zannad F, Redon J, Dominiczak A, Narkiewicz K, Nilsson  
156 PM, Burnier M, Viigimaa M, Ambrosioni E, Caulfield M, Coca A, Olsen MH, Schmieder  
157 RE, Tsioufis C, van de Borne P, Zamorano JL, Achenbach S, Baumgartner H, Bax JJ, Bueno  
158 H, Dean V, Deaton C, Erol C, Fagard R, Ferrari R, Hasdai D, Hoes AW, Kirchhof P, Knuuti

- 159 J, Kolh P, Lancellotti P, Linhart A, Nihoyannopoulos P, Piepoli MF, Ponikowski P, Sirnes  
160 PA, Tamargo JL, Tendera M, Torbicki A, Wijns W, Windecker S, Clement DL, Coca  
161 A, Gillebert TC, Tendera M, Rosei EA, Ambrosioni E, Anker SD, Bauersachs J, Hitij  
162 JB, Caulfield M, De Buyzere M, De Geest S, Derumeaux GA, Erdine S, Farsang C, Funck-  
163 Brentano C, Gerc V, Germano G, Gielen S, Haller H, Hoes AW, Jordan J, Kahan T, Komajda  
164 M, Lovic D, Mahrholdt H, Olsen MH, Ostergren J, Parati G, Perk J, Polonia J, Popescu  
165 BA, Reiner Z, Rydén L, Sirenko Y, Stanton A, Struijker-Boudier H, Tsioufis C, van de Borne  
166 P, Vlachopoulos C, Volpe M, Wood DA (2013) ESH/ESC guidelines for the management of  
167 arterial hypertension: the Task Force for the Management of Arterial Hypertension of the  
168 European Society of Hypertension (ESH) and the European Society of Cardiology (ESC). *Eur*  
169 *Heart J* 34:2159-2219. <https://doi.org/10.1093/eurheartj/eh151>
- 170 8. American Diabetes Association (2018) 2. Classification and Diagnosis of Diabetes: Standards  
171 of Medical Care in Diabetes-2018. *Diabetes Care* 41:S13-S27. <https://doi.org/10.2337/dc18->  
172 [S002](https://doi.org/10.2337/dc18-S002)
- 173 9. Bui HN, Sluss PM, Blincko S, Knol DL, Blankenstein MA, Heijboer AC (2013) Dynamics of  
174 serum testosterone during the menstrual cycle evaluated by daily measurements with an ID-  
175 LC-MS/MS method and a 2nd generation automated immunoassay. *Steroids* 78:96-101.  
176 <https://doi.org/10.1016/j.steroids.2012.10.010>
- 177  
178
